# Supplementary material for: Quantification of Trastuzumab–HER2 Engagement In Vitro and In Vivo
Source: MDPI journal article supplement (doi:10.3390/molecules25245976), 2020-12-17
Supplement: s1 [file s1]

Article

# Quantification of Trastuzumab–HER2 Engagement In Vitro and In Vivo

Alena Rudkouskaya <sup>1</sup>, Jason T. Smith <sup>2</sup>, Xavier Intes <sup>2</sup> and Margarida Barroso <sup>1,\*</sup>

<sup>1</sup> Department of Molecular and Cellular Physiology, Albany Medical College, Albany, NY 12208, USA; rudkoua@amc.edu

<sup>2</sup> Center for Modeling, Simulation, and Imaging in Medicine, Rensselaer Polytechnic Institute, Troy, NY 12180, USA; smithj28@rpi.edu (J.T.S.); intesx@rpi.edu (X.I.)

\* Correspondence: barroso@amc.edu; Tel.: +1-518-573-3816

## Supplemental Material

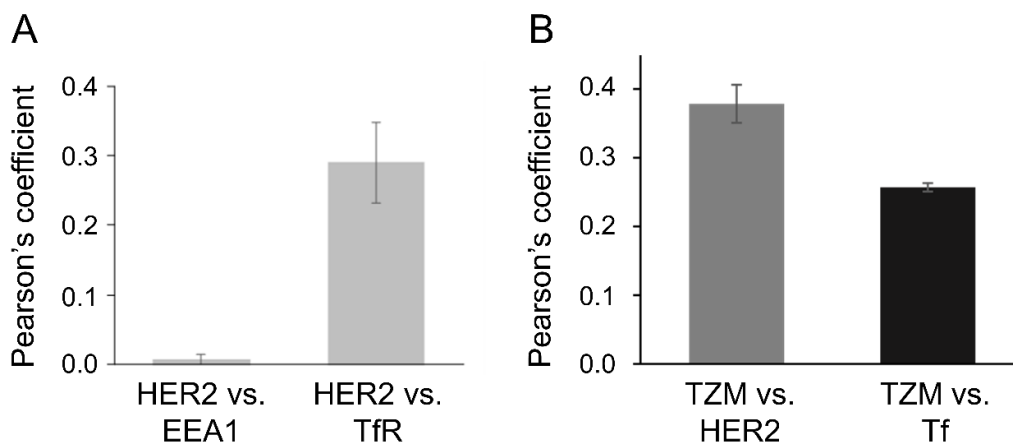

**Figure S1.** Colocalization analysis of HER2 and TSM with endocytic markers. (A) AU565 cells were subjected to immunostaining with anti-HER2, anti-EEA1 and anti-TfR as described in Figure 1A. Pearson coefficient was calculated on images shown in Figure 1A. (B) AU565 cells were subjected to 24 h uptake with 5  $\mu$ g/mL TSM-AF700 and 5  $\mu$ g/mL Tf-AF568 and processed for immunostaining for HER2 as shown in Figure 1B. Pearson coefficient was calculated on images shown in Figure 1B. Collected z-stacks were analyzed for colocalization in Imaris (Bitplane) software, as described in [26]. Data presented as mean and standard deviation, n=3-5.

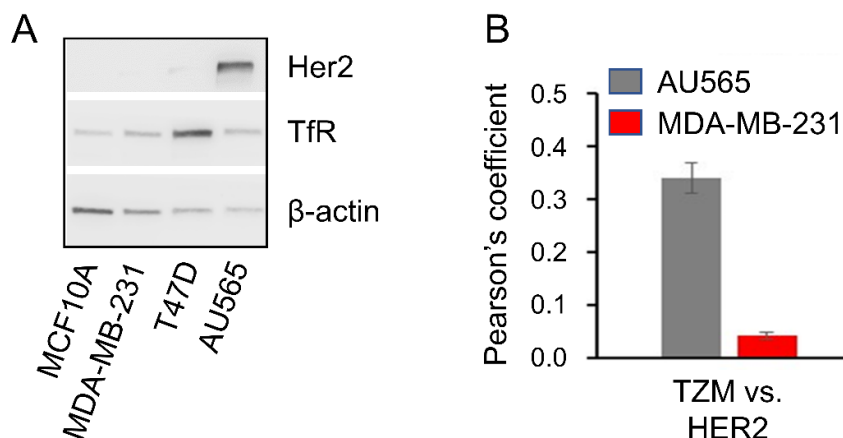

**Figure S2.** (A) Representative Western blot of HER2 and TfR expression in breast cancer cells and non-cancerous MCF10A cells. (B) AU565 and MDA-MB-231 cells were subjected to 24 h uptake with 20  $\mu\text{g/mL}$  TZM-AF700 and processed for immunostaining for HER2. Pearson coefficient was calculated on images shown in Figure 2B. Collected z-stacks were analyzed for colocalization in Imaris (Bitplane) software, as described in [26]. Data presented as mean and standard deviation,  $n=5$ .

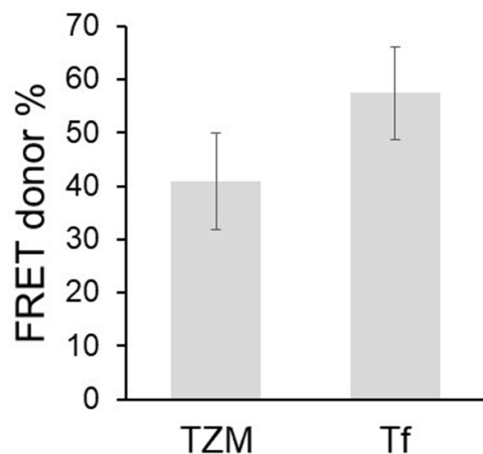

**Figure S3.** Comparison of NIR TZM-HER2 and Tf-TfR FLIM FRET in AU565 cells. Data presented as mean and standard deviation,  $n=10$  points from five separate ROIs.

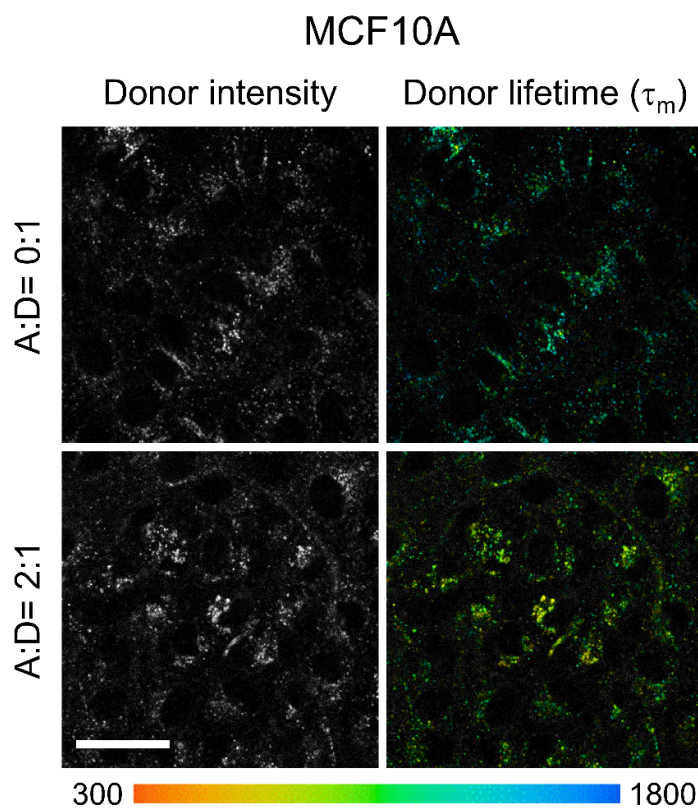

**Figure S4.** Representative TCSPC images of fluorescence intensity and mean lifetime map ( $\tau_m$ ) in MCF10A cells treated with TZM-AF700 (Acceptor: Donor =0:1), TZM-AF700 and TZM-AF750 (A:D=2:1) pseudo-color range= 500-1,800 ps. Photon counts were insufficient for adequate fitting analysis.
